# Supplementary material for: Typhoon statistics in variable resolution Asia-Pacific CAM-SE
Source: Copernicus journal article supplement (doi:10.5194/egusphere-2024-2415), 2024-08-14
Supplement: Supplementary file [file egusphere-2024-2415-AC2-supplement.pdf]

## Major comment 1:

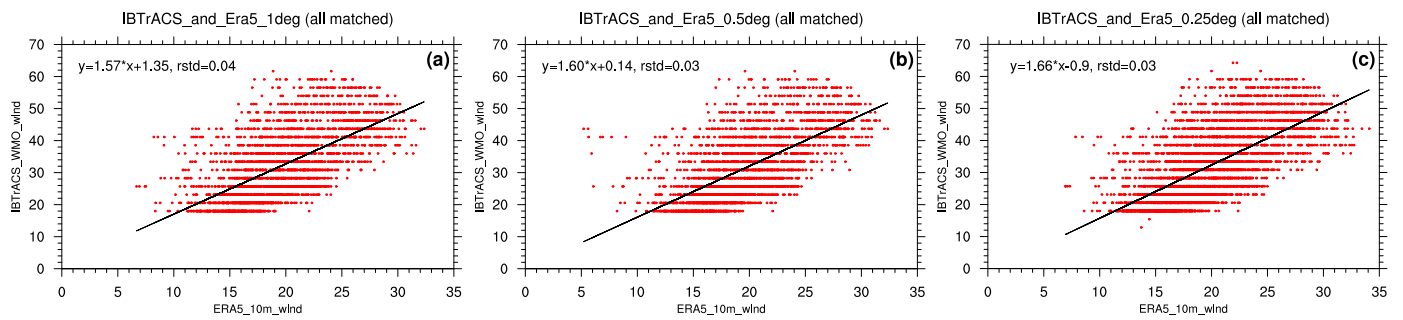

Figure 1-1. Linear regression between IBTrACS and ERA5 regridded to (a) 1.0°, (b) 0.5° (c) 0.25°.

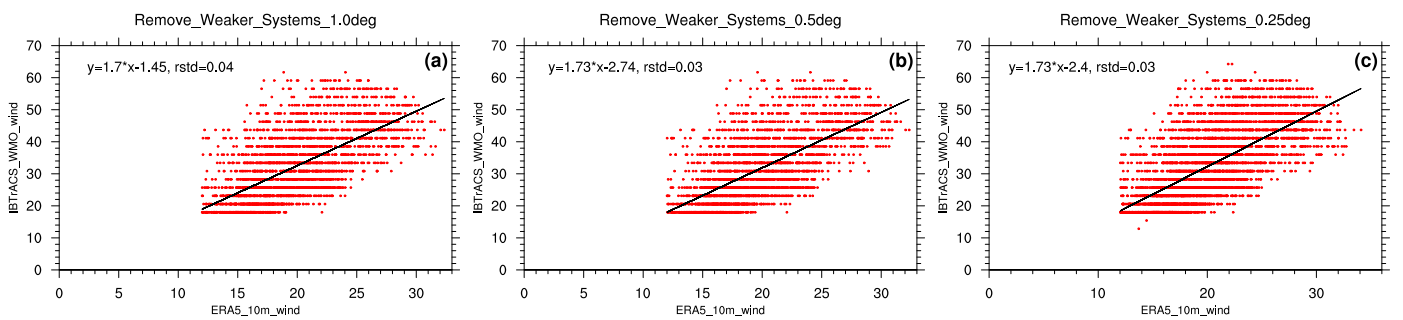

Figure 1-2. Like Figure 1-1, but only using data pairs (timesteps for each TC) where ERA5 wind speed  $\geq 12$  m/s.

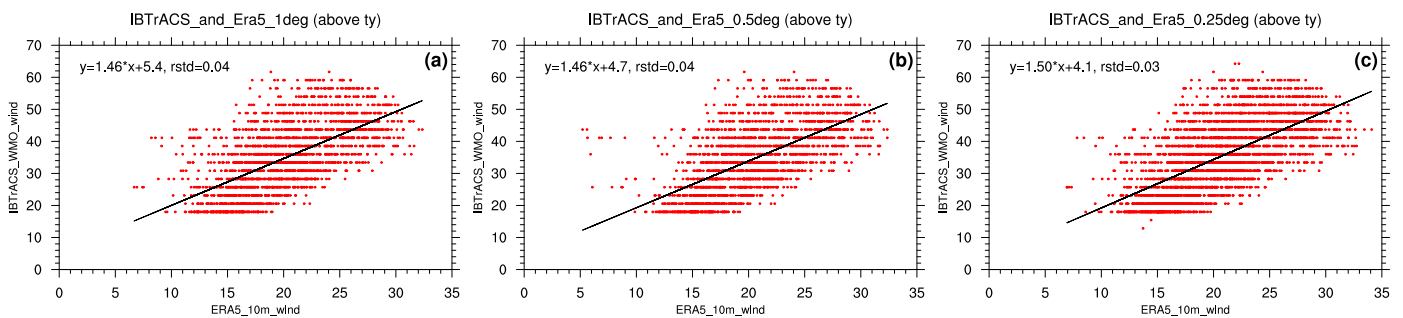

Figure 1-3. Like Figure 1-1, but only using TCs which have at any time reached “typhoon” strength (IBTrACS MSW  $\geq 32.7$  m/s).

**Major comment 2:**

**Table 2-1.** TCs (number/year) using different data sources, with the range calculated from using a scaling correction factor of 1.7 and 1.9, and the standard deviations in parentheses.

| row | Grid                  | Scale factor | TCs by category (/year) |       |           |           | Total TCs (/year) |
|-----|-----------------------|--------------|-------------------------|-------|-----------|-----------|-------------------|
|     |                       |              | <TY                     | TY    | STY       | SPTY      |                   |
| 1   | IBTrACS (2001–2020)   | N/A          | 12 (3)                  | 5 (2) | 4 (2)     | 4 (3)     | 25 (4) + 5        |
| 2   | 0.25°ERA5 (2011–2020) | 1.7          | 8 (3)                   | 9 (2) | 6 (3)     | 2 (1)     | 25 (6)            |
| 3   |                       | 1.9          | 6 (3)                   | 7 (3) | 7 (3)     | 5 (3)     | 25 (5)            |
| 4   | ne30                  | 1.7          | 4 (2)                   | 1 (1) | 0.4 (0.6) | 0         | 6 (2)             |
| 5   |                       | 1.9          | 3 (1)                   | 2 (2) | 0.5 (0.6) | 0.2 (0.5) | 6 (2)             |
| 6   | ne30×2                | 1.7          | 9 (3)                   | 6 (2) | 3 (2)     | 1 (1)     | 19 (4)            |
| 7   |                       | 1.9          | 8 (3)                   | 7 (3) | 3 (1)     | 3 (2)     | 21 (5)            |
| 8   | ne30×4                | 1.7          | 13 (4)                  | 6 (3) | 4 (2)     | 4 (2)     | 27 (6)            |
| 9   |                       | 1.9          | 12 (5)                  | 7 (3) | 5 (3)     | 6 (3)     | 30 (7)            |

**Major comment 3:**

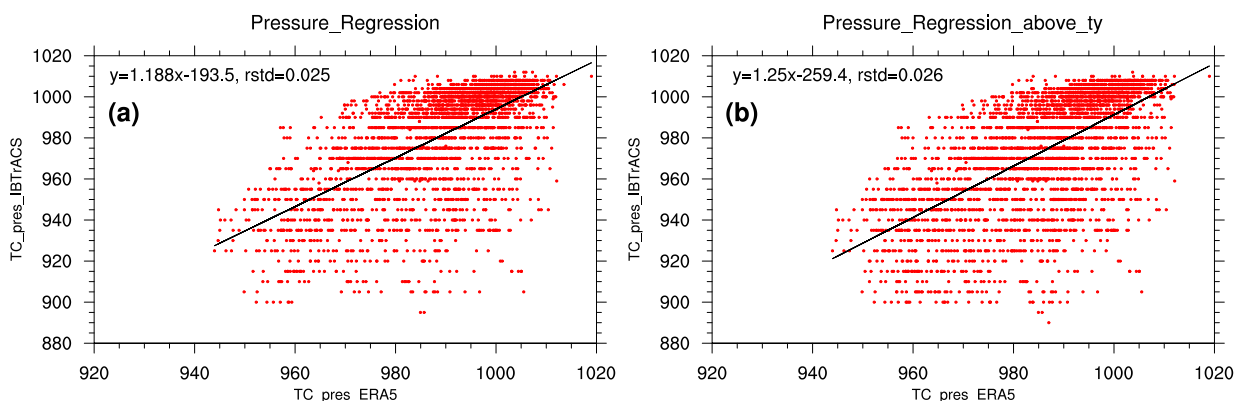

**Figure 3-1.** Linear regression of minimum MSLP between IBTrACS and 0.25° ERA5, using (a) all data, (b) but only using TCs which have at any time reached “typhoon” strength (IBTrACS MSW $\geq$ 32.7 m/s)
